# Supplementary material for: Immobilising a cobalt cubane catalyst on a dye-sensitised TiO2 photoanode via electrochemical polymerisation for light-driven water oxidation
Source: Royal Society of Chemistry journal article supplement (doi:10.1039/c6ra24989b), 2017-01-01
Supplement: c6ra24989b1.pdf [file c6ra24989b1.pdf]

# Immobilising cobalt cubane catalyst on a dye- sensitised TiO<sub>2</sub> photoanode via electrochemical polymerisation for light-driven water oxidation

Jialing Li<sup>a</sup>, Yi Jiang<sup>a,\*</sup>, Qian Zhang<sup>a</sup>, Xiaochen Zhao<sup>b</sup>, Na Li<sup>a,c</sup>, Haili Tong<sup>a</sup>, Xiaoxuan Yang<sup>a</sup>, Lixin Xia<sup>a,\*</sup>

<sup>a</sup> College of Chemistry, Liaoning University, Shenyang 110036, Liaoning, China

<sup>b</sup> State Key Laboratory of Catalysis, Dalian Institute of Chemical Physics, Chinese Academy of Sciences, Dalian 116023, Liaoning, China

<sup>c</sup> Department of Chemical Engineering, Yingkou Institute of Technology, Yingkou 115000, Liaoning, China

\*E-mails: [jiangyi@lnu.edu.cn](mailto:jiangyi@lnu.edu.cn)

## Supporting Information

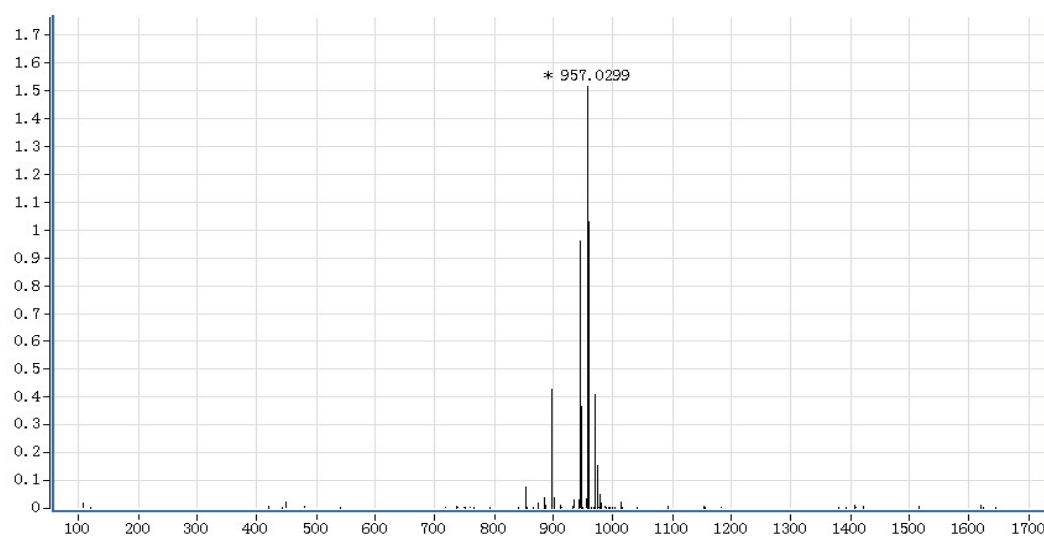

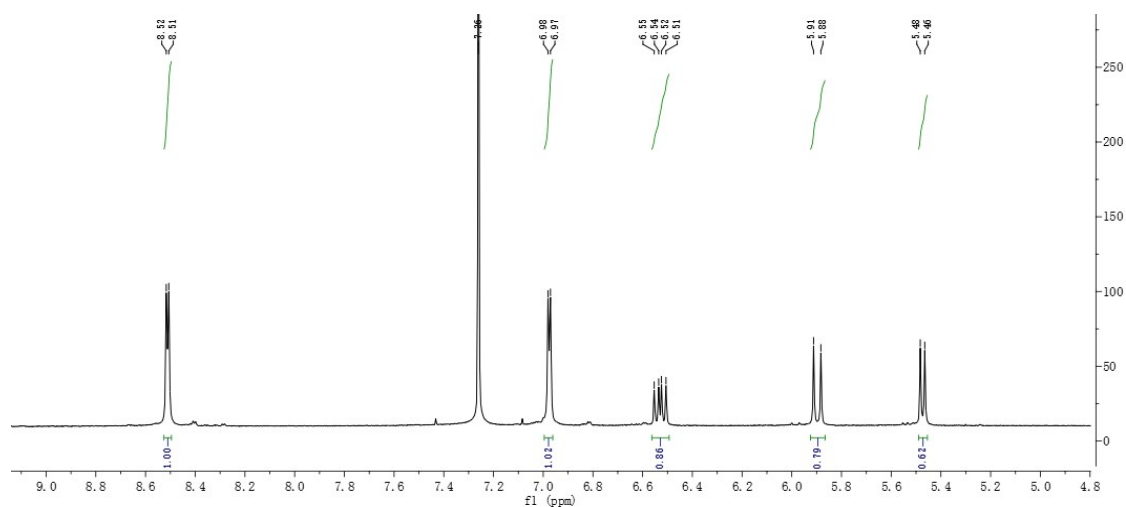

**Fig. S1** The MS and H-NMR of  $\text{Co}_4\text{O}_4(\text{O}_2\text{CMe})_4(4\text{-vinylpy})_4$ .

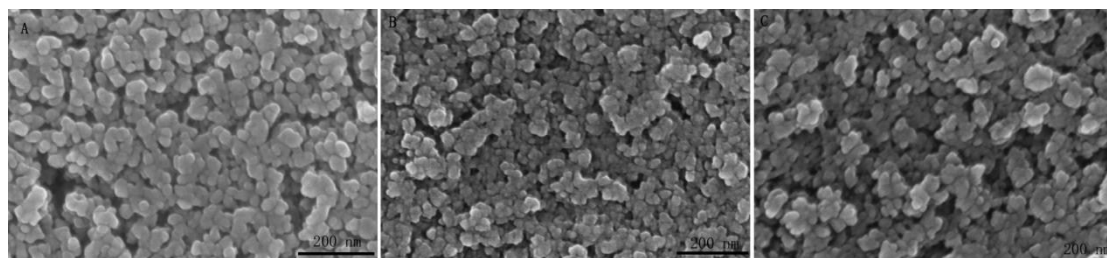

**Fig. S2** SEM images of  $\text{TiO}_2$  (A),  $\text{RuP/TiO}_2$  (B),  $\text{Poly-Co}_4\text{O}_4+\text{RuP/TiO}_2$  (C).

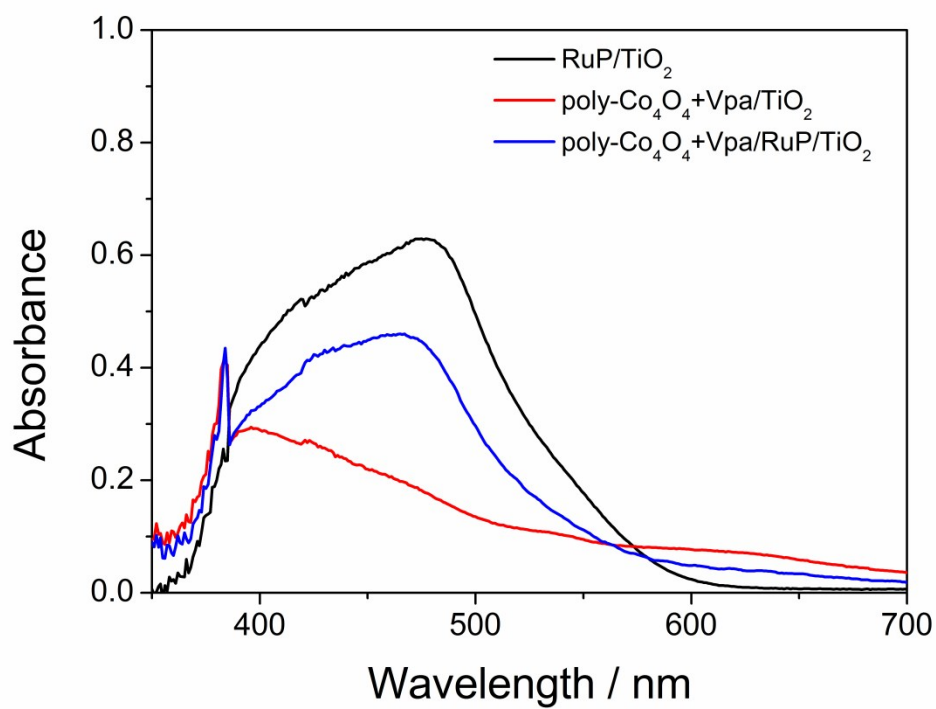

**Fig. S3** The UV-Vis absorption spectra of  $\text{RuP/TiO}_2$ ,  $\text{Poly-Co}_4\text{O}_4+\text{Vpa/TiO}_2$ , and  $\text{Poly-Co}_4\text{O}_4+\text{Vpa/RuP/TiO}_2$ .

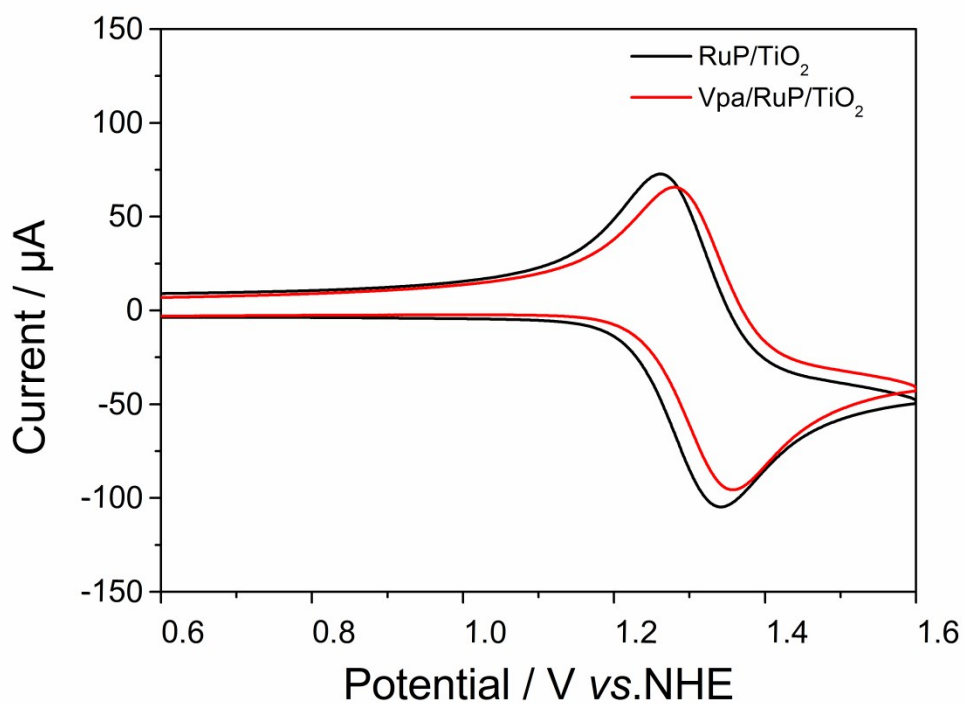

**Fig. S4** CV curves of RuP/TiO<sub>2</sub> (black line) and Vpa/RuP/TiO<sub>2</sub> (red line) in pH 7.0 Na<sub>2</sub>SO<sub>4</sub> electrolyte (100 mM).

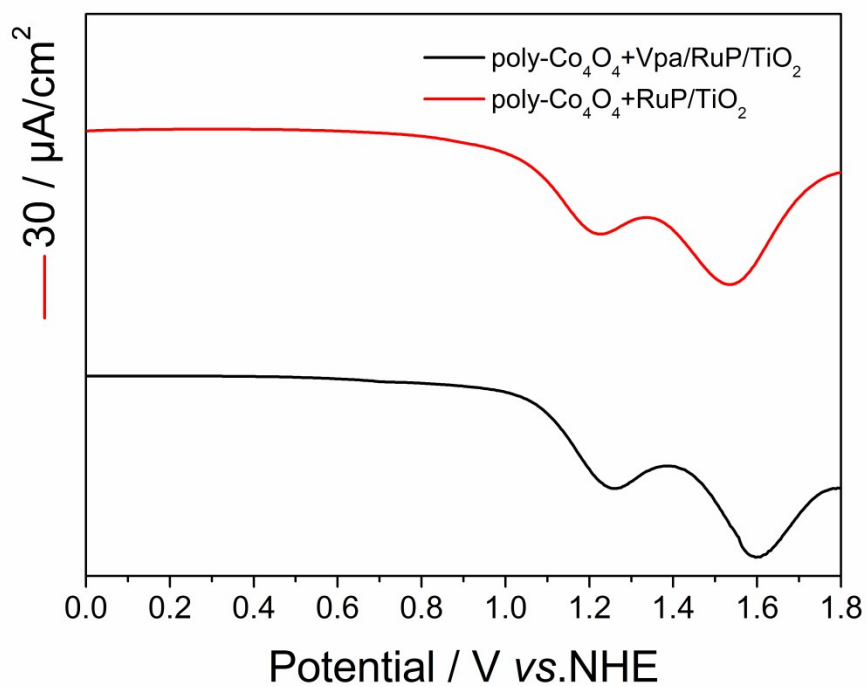

**Fig. S5** DPV curves of Poly-Co<sub>4</sub>O<sub>4</sub>+Vpa/RuP/TiO<sub>2</sub> (black line) and Poly-Co<sub>4</sub>O<sub>4</sub>+RuP/TiO<sub>2</sub> (red line) in acetonitrile.

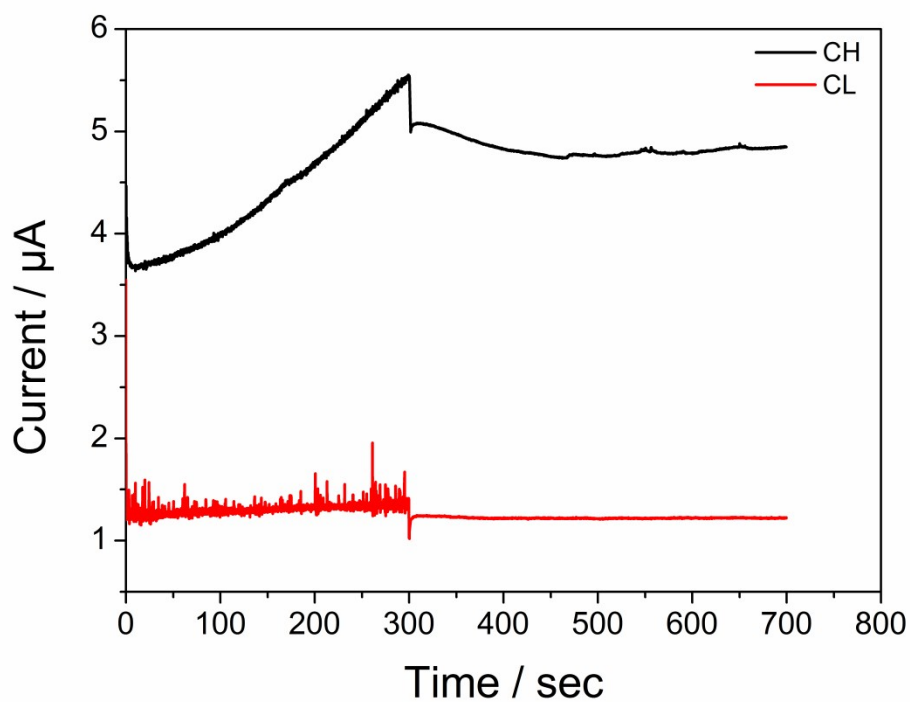

**Fig. S6** Current–time traces of the collector at -1.05 V vs. NHE (black traces CH) and at -0.55 V vs. NHE (red traces CL) in  $\text{Na}_2\text{SO}_4$  solution (100 mM) with the generator at 0.4 V vs. NHE under illumination from 0 to 300 s and darkened from 300 to 700 s.

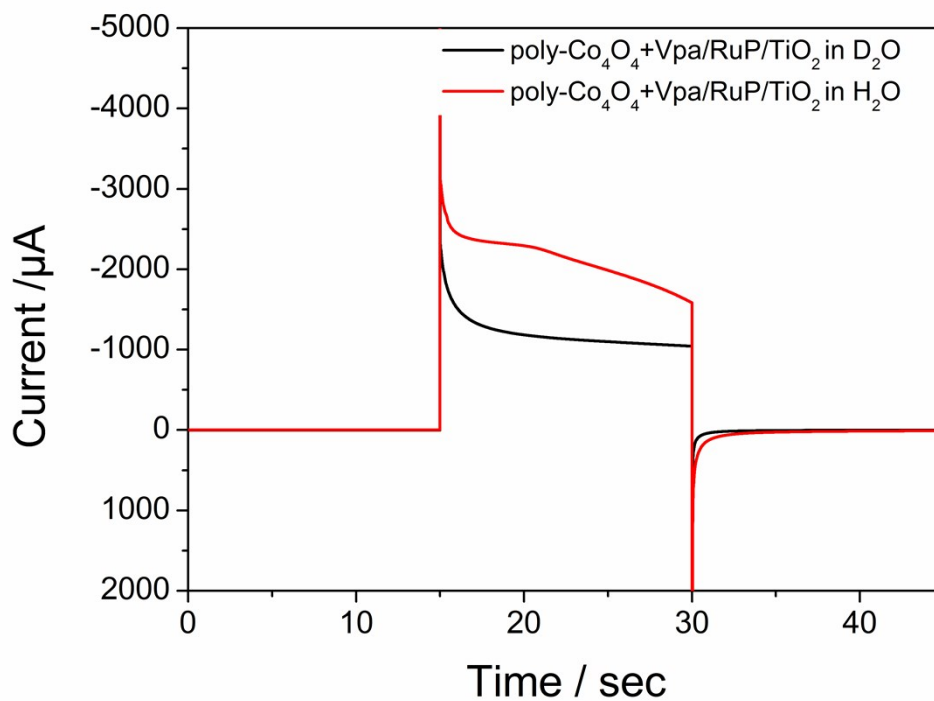

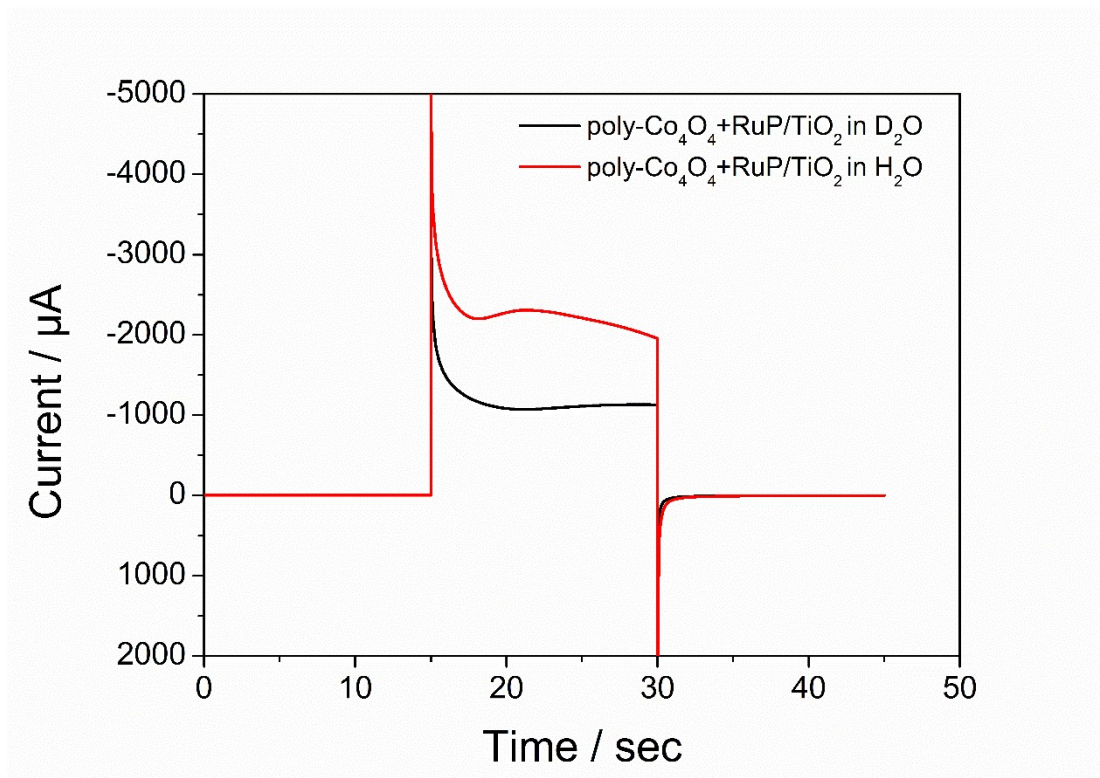

**Fig. S7** Chronoamperometric current densities measured in 100 mM  $\text{Na}_2\text{SO}_4$  aqueous ( $\text{H}_2\text{O}$  or  $\text{D}_2\text{O}$ ) solution under application of sequential potential steps with 1.7 V vs. NHE.
